# Supplementary material for: Binding of hnRNP H and U2AF65 to Respective G-codes and a Poly-Uridine Tract Collaborate in the N50-5'ss Selection of the REST N Exon in H69 Cells
Source: PubMed Central journal article supplement (PMC3390395; doi:10.1371/journal.pone.0040315), 2012-07-05
Supplement: pone.0040315.s001.pdf [file pone.0040315.s001.pdf]

| GENE AMPLIFIED                | OLIGONUCLEOTIDE SEQUENCE (5' → 3')                                            | NAME                 | PCR PARAMETERS                   | PRODUCT LENGTH |
|-------------------------------|-------------------------------------------------------------------------------|----------------------|----------------------------------|----------------|
| FOR PCR                       |                                                                               |                      |                                  |                |
| REST                          | GCAGGAGAACGCCATATAAATGTG<br>CTGGTAGTCACCTGGATCACTGAGAC                        | V-fwd<br>VI-rev      | 94°C/30 s, 64°C/30 s, 72°C/60    | 578 + 628      |
| REST-N50                      | GCAGGAGAACGCCATATAAATGTG<br>CCTGAATACATACCCATCAGATC                           | V-fwd<br>N-rev       | 94°C/30 s, 58°C/30 s, 72°C/30 s  | 143            |
| TMS1                          | TGGGCCTGCAGGAGATG<br>ATTTGGTGGGATTGCCAG                                       | TMS1-fwd<br>TMS1-rev | 94°C/30 s, 54°C/30 s, 72°C/30 s  | 410            |
| RRAD                          | TTTACAAGGTGCTGCTGCTGGG<br>TGCCGCTGATGCTCAATGAAC                               | RRAD-fwd<br>RRAD-rev | 94°C/30 s, 64°C/45 s, 72°C/60 s  | 433            |
| ACTIN                         | GTGGGGCGCCCGCAGGCACCA<br>CTCCTTAATGTCACGCACGATTTC                             | ACT-fwd<br>ACT-rev   | 95°C/45 s, 55°C/45 s, 72°C/30 s  | 523            |
| β-globin minigene             | ATTTAGGTGACACTATAG<br>TAATACGACTCACTATAG                                      | SP6<br>T7            | 95°C/45 s, 55°C/45 s, 72°C/30 s  | 556            |
| N/2                           | ATTTAGGTGACACTATAG<br>CCATTTGGTAATATTTACTAGAGTGT                              | SP6<br>rtN62         | 95°C/45 s, 55°C/45 s, 72°C/30 s  | 356            |
| FOR TRANSCRIPTION             |                                                                               |                      |                                  |                |
| REST DNA TEMPLATE             | GGAGAAGAATTGTCCAGTCAGCTG<br>CTGGTAGTCACCTGGATCACTGAGAC                        | Int 6-fwd<br>VI-rev  | 94°C/30 s, 64°C/30 s, 72°C/60    | 2953           |
| fiWT PROBE                    | TAATACGACTCACTATAGGGACCAGTGGGGTATGGATACCAATTTGG<br>TACATAAAAAACCAGAACCCCAACCC | N4T7-fwd<br>PU-rev   | 94°C/30 s, 64°C/30 s, 72°C/60    | 125            |
| WT PROBE                      | TAATACGACTCACTATAGCTACAGTGTGATCTAGATGGGTATG<br>TACATAAAAAACCAGAACCCCAACCC     | N50T7-fwd<br>PU-rev  | 94°C/30 s, 64°C/30 s, 72°C/60    | 90             |
| PU MUT used in SF5            | TAATACGACTCACTATAGCTACAGTGTGATCTAGATGGGTATG<br>TACATGATATCCAGAACCCCAACCC      | N50T7-fwd<br>PU mut  | 94°C/30 s, 64°C/30 s, 72°C/60    | 90             |
| PROBE used in SF3             | TAATACGACTCACTATAGGGACCAGTGGGGTATGGATACCAATTTGG<br>CCTGAATACATACCCATCTAGATC   | N4T7-fwd<br>N-rev    | 94°C/30 s, 64°C/30 s, 72°C/60    | 70             |
| FOR SEQUENCING AND CONSTRUCTS |                                                                               |                      |                                  |                |
| N EXON SEQ/ TEMPLATE          | TGCTCAAAGTCTCAGAGTGAG<br>TACATAAAAAACCAGAACCCCAACCC                           | Seq1s<br>PU-rev      | 94°C/30 s, 64°C/45 s, 72°C/60 s  | 593            |
| WT N EXON                     | GGAGAAGAATTGTCCAGTCAGCTG<br>TACATAAAAAACCAGAACCCCAACCC                        | 2REN/IVs<br>PU-rev   | 94°C/30 s, 64°C/45 s, 72°C/60 s  | 358            |
| N EXON PU mut                 | GGAGAAGAATTGTCCAGTCAGCTG<br>TACATGATATCCAGAACCCCAACCC                         | 2REN/IVs<br>PU mut   | 94°C/30 s, 64°C/45 s, 72°C/60 s  | 358            |
| N EXON G2G3 mut               | GGAGAAGAATTGTCCAGTCAGCTG<br>TACATAAAAAACCAGAACCGTGACCGTG                      | 2REN/IVs<br>G2G3m-as | 94°C/30 s, 64°C/45 s, 72°C/60 s  | 358            |
| N EXON d mut                  | GGAGAAGAATTGTCCAGTCAGCTG<br>TACATGATATCCAGAACCGTGACCGTG                       | 2REN/IVs<br>d-mut    | 94°C/30 s, 64°C/45 s, 72°C/60 s  | 358            |
| GLOBIN                        | CCTCAAACAGACACCATGGTGC<br>CCCTGAAGTTCTCAGGATCCACG                             | gloF<br>gloTR        | 94°C/30 s, 64°C/30 s, 72°C/60 s  | 529            |
| U2AF65                        | CTCGAGCTACCAGAAGTCCCGGCG<br>GGATCCAGTCGGACTTCGACGAGTTC                        | U2AF65F<br>U2AF65R   | 95°C/30 s, 65°C/60 s, 72°C/150 s | 1488           |
