# Supplementary material for: Binding of hnRNP H and U2AF65 to Respective G-codes and a Poly-Uridine Tract Collaborate in the N50-5'ss Selection of the REST N Exon in H69 Cells
Source: PubMed Central journal article supplement (PMC3390395; doi:10.1371/journal.pone.0040315), 2012-07-05

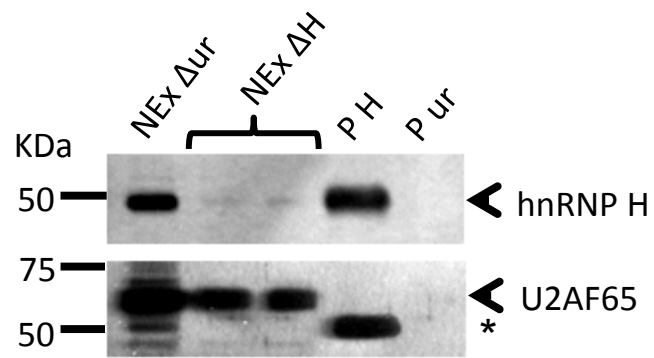

Supplement: pone.0040315.s003.pdf [file pone.0040315.s003.pdf]
