# Supplementary material for: Binding of hnRNP H and U2AF65 to Respective G-codes and a Poly-Uridine Tract Collaborate in the N50-5'ss Selection of the REST N Exon in H69 Cells
Source: PubMed Central journal article supplement (PMC3390395; doi:10.1371/journal.pone.0040315), 2012-07-05

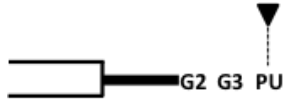

|                 |   |   |   |   |   |   |   |   |
|-----------------|---|---|---|---|---|---|---|---|
| H69 NEx         | - | + | - | - | - | - | - | - |
| $\Delta$ U2AF65 | - | - | + | - | - | - | - | - |
| $\Delta$ unrel  | - | - | - | + | - | - | - | - |
| MRC5 NEx        | - | - | - | - | - | + | + | - |
| rU2AF65         | - | - | - | - | - | - | + | + |

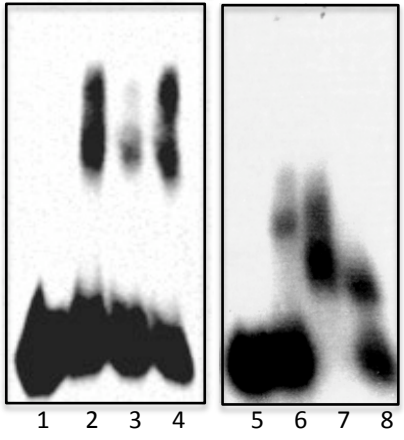

Supplement: pone.0040315.s004.pdf [file pone.0040315.s004.pdf]
