# Supplementary material for: Binding of hnRNP H and U2AF65 to Respective G-codes and a Poly-Uridine Tract Collaborate in the N50-5'ss Selection of the REST N Exon in H69 Cells
Source: PubMed Central journal article supplement (PMC3390395; doi:10.1371/journal.pone.0040315), 2012-07-05

A

```
RRAD   CCCAGCCCGGCGGCCTGGGCC
      ||||| | ||| | | |||
NRSE consensus TTCAGCACACGGACAGCGCC
      | || | ||||| | | | |
TMS1   TGGAGGGCAACGGACCGGGC
```

B

|            |   |   |   |
|------------|---|---|---|
| tREST cDNA | - | + | - |
| MOCK       | - | - | + |
| RT         | - | + | + |

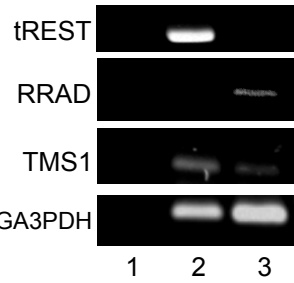

Supplement: pone.0040315.s005.pdf [file pone.0040315.s005.pdf]
