# Supplementary material for: Binding of hnRNP H and U2AF65 to Respective G-codes and a Poly-Uridine Tract Collaborate in the N50-5'ss Selection of the REST N Exon in H69 Cells
Source: PubMed Central journal article supplement (PMC3390395; doi:10.1371/journal.pone.0040315), 2012-07-05
Supplement: pone.0040315.s008.pdf [file pone.0040315.s008.pdf]

|                       |   |   |   |   |   |   |
|-----------------------|---|---|---|---|---|---|
| NEx c.o.              | - | + | - | - | - | - |
| NEx U1 k.o.           | - | - | + | - | - | - |
| H69 NEx               | - | - | - | + | - | - |
| $\Delta$ U2AF65       | - | - | - | - | + | - |
| $\Delta$ 65 + rU2AF65 | - | - | - | - | - | + |

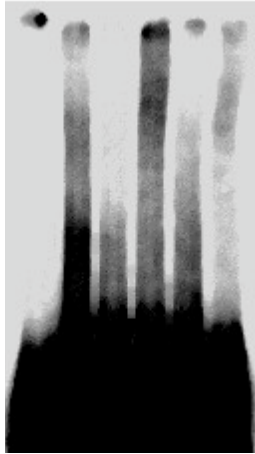

1 2 3 4 5 6
